# Supplementary material for: Leveraging Administrative Data to Better Understand and Address Child Maltreatment: A Scoping Review of Data Linkage Studies
Source: PubMed Central journal article supplement (PMC9806482; doi:10.1177/10775595221079308), 2022-03-03
Supplement: sj-pdf-1-cmx-10.1177_10775595221079308.pdf [file sj-pdf-1-cmx-10.1177_10775595221079308.pdf]

Supplementary Table 1. Search strategies by database

MEDLINE

| Data linkage                                                                                                                                | Children and young people                                                                                                                                    |
|---------------------------------------------------------------------------------------------------------------------------------------------|--------------------------------------------------------------------------------------------------------------------------------------------------------------|
| data adj1 link* OR record* adj1 link* OR data adj1 match* OR “administrative data cohort” OR electronic adj2 cohort OR “longitudinal link*” | Child* OR “young person” OR “young people” OR youth OR adolescen* OR teenage* OR juvenile* OR toddler* OR infant OR infants OR infancy OR student* OR pupil* |
| OR Medical Record Linkage/                                                                                                                  | OR adolescent/ OR child/ OR child, preschool/ OR infant/ OR students/                                                                                        |

Embase

| Data linkage                                                                                                                                | Children and young people                                                                                                                                    |
|---------------------------------------------------------------------------------------------------------------------------------------------|--------------------------------------------------------------------------------------------------------------------------------------------------------------|
| data adj1 link* OR record* adj1 link* OR data adj1 match* OR “administrative data cohort” OR electronic adj2 cohort OR “longitudinal link*” | Child* OR “young person” OR “young people” OR youth OR adolescen* OR teenage* OR juvenile* OR toddler* OR infant OR infants OR infancy OR student* OR pupil* |
| OR Medical Record Linkage/                                                                                                                  | OR adolescent/ OR child/ OR preschool child OR infant/ OR student/                                                                                           |

PsycINFO

| Data linkage                                                                                                                        | Children and young people                                                                                                                                    |
|-------------------------------------------------------------------------------------------------------------------------------------|--------------------------------------------------------------------------------------------------------------------------------------------------------------|
| data N1 link* OR record* N1 link* OR data N1 match* OR “administrative data cohort” OR electronic N2 cohort OR “longitudinal link*” | Child* OR “young person” OR “young people” OR youth OR adolescen* OR teenage* OR juvenile* OR toddler* OR infant OR infants OR infancy OR student* OR pupil* |

CINAHL

| Data linkage                                                                                                                        | Children and young people                                                                                                                                    |
|-------------------------------------------------------------------------------------------------------------------------------------|--------------------------------------------------------------------------------------------------------------------------------------------------------------|
| data N1 link* OR record* N1 link* OR data N1 match* OR “administrative data cohort” OR electronic N2 cohort OR “longitudinal link*” | Child* OR “young person” OR “young people” OR youth OR adolescen* OR teenage* OR juvenile* OR toddler* OR infant OR infants OR infancy OR student* OR pupil* |
|                                                                                                                                     | OR (MH "Child, Preschool") OR (MH "Child") OR (MH "Infant") OR (MH "Adolescence") OR (MH “Students”)                                                         |

ERIC

| Data linkage                                                                                                                        | Children and young people                                                                                                                          |
|-------------------------------------------------------------------------------------------------------------------------------------|----------------------------------------------------------------------------------------------------------------------------------------------------|
| data N1 link* OR record* N1 link* OR data N1 match* OR “administrative data cohort” OR electronic N2 cohort OR “longitudinal link*” | Child* OR “young person” OR “young people” OR youth OR adolescen* OR teenage* OR juvenile* OR toddler* OR infant OR infants OR infancy OR student* |

|  |                                                                                                                                                                              |
|--|------------------------------------------------------------------------------------------------------------------------------------------------------------------------------|
|  | OR pupil*<br><br>OR DE "Adolescents" OR DE "Children"<br>OR DE "Preadolescents" OR DE "Youth"<br>OR DE "Infants" OR DE "Young Children"<br>OR DE "Toddlers" OR DE "Students" |
|--|------------------------------------------------------------------------------------------------------------------------------------------------------------------------------|
